# Supplementary material
Source: MDPI journal article supplement (https://www.mdpi.com/2073-4395/10/10/1476)
Supplement: s1 [file s1]

## Supplementary Materials

Table S1. Soil chemical analysis of ‘Fuji’ apple orchards.

| Parameters                                    | Orchard 1 | Orchard 2 |
|-----------------------------------------------|-----------|-----------|
| pH(1:2.5 soil:water)                          | 6.84      | 6.44      |
| Electrical conductivity (dS m <sup>-1</sup> ) | 0.15      | 0.09      |
| Organic matter (%)                            | 2.72      | 4.69      |
| Olsen-P (mg kg <sup>-1</sup> )                | 84.0      | 22.0      |
| K (cmolc kg <sup>-1</sup> )                   | 0.53      | 0.45      |
| Ca (cmolc kg <sup>-1</sup> )                  | 11.30     | 6.20      |
| Mg (cmolc kg <sup>-1</sup> )                  | 2.73      | 1.32      |
| Na (cmolc kg <sup>-1</sup> )                  | 0.15      | 0.12      |
| Cu (mg kg <sup>-1</sup> )                     | 18.9      | 4.71      |
| Fe (mg kg <sup>-1</sup> )                     | 89.3      | 57.5      |
| Mn (mg kg <sup>-1</sup> )                     | 6.4       | 0.99      |
| Zn (mg kg <sup>-1</sup> )                     | 25.5      | 3.43      |
| B (mg kg <sup>-1</sup> )                      | 0.64      | 0.59      |

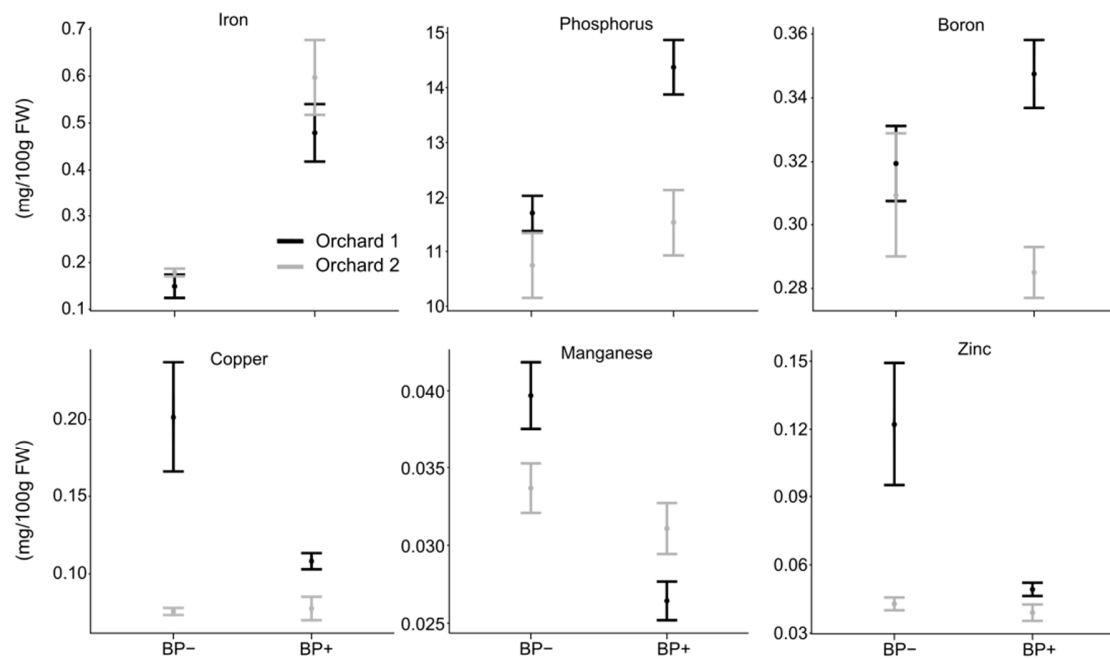

Figure S1. Interaction plots for mineral concentrations for healthy and bitter pit affected fruit in both orchards after 150 days of storage at 0° C for the 2018 season.

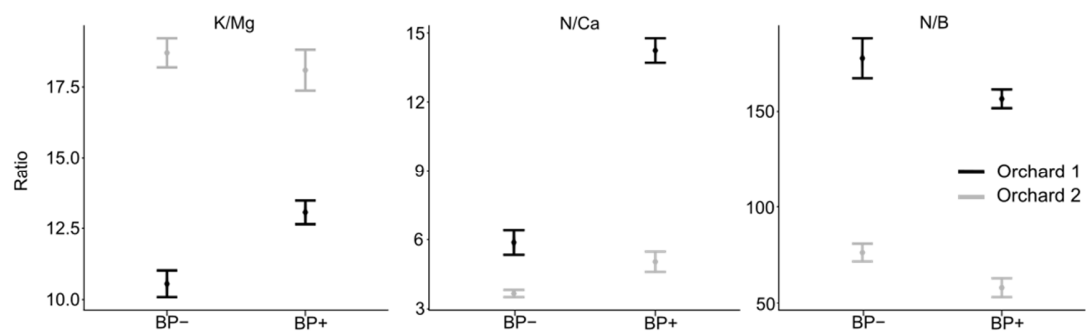

Figure S2. Interaction plots for mineral relationships for healthy and bitter pit affected fruit in both orchards after 150 days of storage at 0 °C for the 2018 season.
